# Combinatorial Optimization of Cystine-Knot Peptides towards High-Affinity Inhibitors of Human Matriptase-1

Bernhard Glotzbach<sup>1</sup>\*, Michael Reinwarth<sup>1</sup>\*, Niklas Weber<sup>1</sup>, Sebastian Fabritz<sup>2</sup>, Michael Tomaszowski<sup>1</sup>, Heiko Fittler<sup>1</sup>, Andreas Christmann<sup>1</sup>, Olga Avrutina<sup>1</sup>, Harald Kolmar<sup>1\*</sup>

<sup>1</sup> Clemens-Schöpf-Institut für Organische Chemie und Biochemie, Technische Universität Darmstadt, Darmstadt, Germany, <sup>2</sup> AB SCIEX Germany GmbH, Darmstadt, Germany

## Abstract

Cystine-knot miniproteins define a class of bioactive molecules with several thousand natural members. Their eponymous motif comprises a rigid structured core formed by six disulfide-connected cysteine residues, which accounts for its exceptional stability towards thermic or proteolytic degradation. Since they display a remarkable sequence tolerance within their disulfide-connected loops, these molecules are considered promising frameworks for peptide-based pharmaceuticals. Natural open-chain cystine-knot trypsin inhibitors of the MCoTI (*Momordica cochinchinensis* trypsin inhibitor) and SOTI (*Spinacia oleracea* trypsin inhibitor) families served as starting points for the generation of inhibitors of matriptase-1, a type II transmembrane serine protease with possible clinical relevance in cancer and arthritic therapy. Yeast surface-displayed libraries of miniproteins were used to select unique and potent matriptase-1 inhibitors. To this end, a knowledge-based library design was applied that makes use of detailed information on binding and folding behavior of cystine-knot peptides. Five inhibitor variants, four of the MCoTI family and one of the SOTI family, were identified, chemically synthesized and oxidatively folded towards the bioactive conformation. Enzyme assays revealed inhibition constants in the low nanomolar range for all candidates. One subnanomolar binder ( $K_i = 0.83$  nM) with an inverted selectivity towards trypsin and matriptase-1 was identified.

**Citation:** Glotzbach B, Reinwarth M, Weber N, Fabritz S, Tomaszowski M, et al. (2013) Combinatorial Optimization of Cystine-Knot Peptides towards High-Affinity Inhibitors of Human Matriptase-1. PLoS ONE 8(10): e76956. doi:10.1371/journal.pone.0076956

**Editor:** Jose M. Sanchez-Ruiz, Universidad de Granada, Spain

**Received:** June 13, 2013; **Accepted:** August 27, 2013; **Published:** October 11, 2013

**Copyright:** © 2013 Glotzbach et al. This is an open-access article distributed under the terms of the Creative Commons Attribution License, which permits unrestricted use, distribution, and reproduction in any medium, provided the original author and source are credited.

**Funding:** This work was funded by Deutsche Forschungsgemeinschaft (<http://www.dfg.de/en/index.jsp>) through grants KO-1390/9-1 and SPP 1623 grant 1390/10-1. The funders had no role in study design, data collection and analysis, decision to publish, or preparation of the manuscript.

**Competing Interests:** The authors thank AB SCIEX Germany GmbH, Darmstadt for providing equipment and expertise in MS measurements of the cystine-knot peptides. Author Sebastian Fabritz is an employee of AB SCIEX Germany GmbH. There are no patents, products in development or marketed products to declare. This does not alter the authors' adherence to all the PLOS ONE policies on sharing data and materials.

\* E-mail: Kolmar@Biochemie-TUD.de

These authors contributed equally to this work.

## Introduction

Cystine-knot peptides, often referred to as knottins, can be considered as one of Nature's combinatorial libraries [1–4]. These peptides have been identified in various organisms, among them fungi, plantae, porifera, mollusca, arthropoda, and vertebrata. While they share a common fold, they display a notably large diversity within the primary structure of flanking loops that is also correlated with a diversity of biological activities [2–5]. Their amide backbone of about 30 to 40 amino acid residues is compacted by three disulfide bonds which form the characteristic mechanically interlocked structure [6]. Three  $\beta$ -strands linked through three disulfide bonds define their structural core, where the ring-forming connection of CysI and CysIV and CysII to CysV is penetrated by a third cysteine between CysIII and CysVI (Figure 1) [1–4]. NMR measurements of dynamics of backbone NH groups revealed high structural rigidity [7]. Considering the extensive network of hydrogen bonds which permeates the inner core, especially *via* the  $\beta$ -strands, thus adding a substantial thermodynamic stability, the cystine-knot motif displays an exceptional structural and thermal robustness [8–10].

Trypsin inhibitors isolated from the bitter melon *Momordica cochinchinensis* (MCoTI, Figure 1A) and the squirting cucumber

*Ecballium elaterium* (EETI) are prominent members of the ICK (inhibitor cystine-knot) family. Both share the typical architecture of an ICK peptide with the functional loop comprising six amino acids located between CysI and CysII (Figure 1) [3,11]. In contrast, recently reported miniproteins isolated from spinach *Spinacia oleracea* (SOTI I–III, Figure 1B) have shown no similarity to known plant protease inhibitors, but to antimicrobial peptides from the seeds of *Mirabilis jalapa* with the inhibitory loop located between CysV and CysVI (Figure 1) [12,13]. Structural information is available for the members of both inhibitor families [13–17].

Sequence and structure alignments of members of a respective miniprotein family reveal a conserved structural core, while the surface-exposed loops possess a high flexibility in terms of primary structure [3]. Thus, through substitution of surface-exposed residues bioactive variants can be generated that can serve as tailor-made compounds for potential diagnostic and therapeutic applications [10,18–20]. Several knottins have already been optimized by rational design or combinatorial library screening towards binding to targets of medical relevance [18,21–32]. For example, a MCoTI-II-derived miniprotein comprising a non-native hydrazone macrocyclization motif was reported to simul-

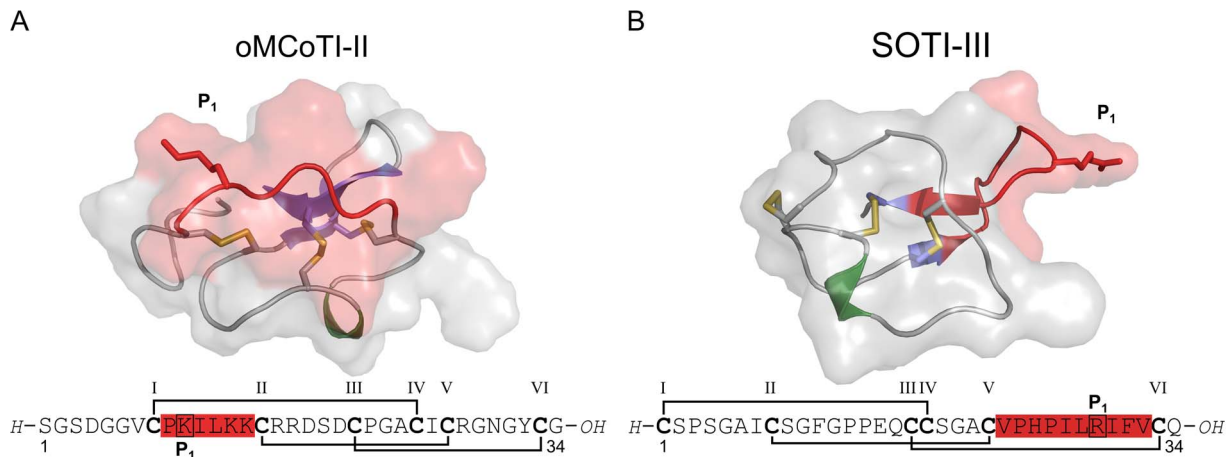

**Figure 1. Sequences and structures of cystine-knot trypsin inhibitors.** (A) Knottin oMCoTI-II (pdb: 1ha9). (B) SOTI-III (pdb: 4aor). Secondary structure is shown as cartoon with surface, and cysteine residues are depicted as yellow sticks; protease-binding regions (or inhibitor loops) are depicted in red,  $\beta$ -sheets - in blue, and  $\alpha$ -helices - in green. Cystine-forming residues are marked bold, and the numbering of respective cysteines is according to their appearance in the sequence.  
doi:10.1371/journal.pone.0076956.g001

taneously inhibit all four monomers of human mast cell tryptase  $\beta$ , a protease of clinical relevance related to allergic asthma [27,28]. Several rounds of directed evolution and rational design of the scorpion-derived miniprotein Leurotoxin I from *Leirus quinquestriatus hebraeus* resulted in its enhanced binding to gp120 of the viral particle of HIV, thus inhibiting cell entry [25,26,33]. Furthermore, cancer-related integrins have been successfully labeled *in vivo* with radioactive  $^{64}\text{Cu}$  and  $^{111}\text{In}$  *in vivo* selective targeting with knottins containing an integrin-binding RGD motif and used for PET (positron emission tomography) and SPECT (single-photon emission computed tomography) imaging [21–24].

Knottins are readily accessible both by recombinant production and SPPS (solid-phase peptide synthesis) [3]. Indeed, obvious difficulties arising upon on-support chain assembly can be easily overcome using the wide-ranging repertoire of modern peptide synthesis, and the crucial step, regioselective formation of a trisulfide pattern, can be efficiently controlled using optimized oxidation conditions [3,34].

Matriptase-1, a TTSP (type II transmembrane serine protease) of about 855 amino acids, belongs to the family of S1 trypsin-like proteases [35,36]. It combines an amino terminal hydrophobic transmembrane region with an extracellular section of several domains, among them a trypsin-like catalytic and a low-density lipoprotein region [35–37]. Autocatalytic activation of the zymogen is assisted by its cognate inhibitor HAI-1 (hepatocyte growth factor activator inhibitor-1) and does not depend on other proteases. To date, the mechanism of autocatalytic activation has not been fully understood [35,37–39]. Interestingly, matriptase-1 is also activated *via* acidification of the enzyme, therefore indicating its role in cellular acidosis [40]. Studies on knock-out mice have shown that matriptase-1 is essential for epidermal barrier functions, hence postnatal survival, as well as growth of hair follicles, and thymic homeostasis [41]. Moreover, matriptase-1 has been reported to be expressed not only in epithelial cells, but also in mast cells, B-cells, and blood monocytes [42–44]. Among its numerous substrates of which most are important for cell adhesion and tissue remodeling, processing of pro-uPA (pro-urokinase plasminogen activator) and pro-HGF (pro-hepatocyte growth factor) have been shown to be significantly involved in tumor growth and metastasis [45]. Expression rates of matriptase-1 were reported to reflect the degree of tumor progression in

several types of cancerous cells, thus indicating a crucial role of this protease in tumor metastasis [46–48]. This was evidenced through various experiments, both *in vitro* and *in vivo*, in which the enzyme was inhibited [35,49–51]. The ratio of matriptase-1 and HAI-1, which is shifted towards matriptase-1 in cancer cells, is of major importance for tumor invasiveness [45,52,53]. Moreover, matriptase-1 has been reported to be implicated in a number of other diseases, among them osteoarthritis and atherosclerosis, and to induce cancer itself [42,54,55]. In conclusion, matriptase-1 has become a promising target for drug development. To date, only one peptide-based inhibitor of matriptase-1 with a picomolar  $K_i$  has been reported [56,57]. Despite its excellent inhibition constants against matriptase-1, this four-amino-acid peptide with the sequence *H-R-Q-A-R-Bt* (Bt stands for carboxy terminal benzothiazole substituent) displays a low selectivity. Since for *in vivo* experiments a high selectivity and serum half-life are indispensable, this inhibitor presumably is not suitable for experiments towards tumor targeting *in vivo*. Here we describe the isolation of selective cystine-knot peptides of high affinity from knowledge-based combinatorial miniprotein libraries and their functional characterization *in vitro* and in cell culture.

## Materials and Methods

### Media and Reagents

All media were prepared as previously reported [18,58,59]. YPD medium contained 20 g/L peptone, 20 g/L dextrose, and 10 g/L yeast extract. Selective SD-CAA medium incorporated 6.7 g/L yeast nitrogen base without amino acids, 20 g/L dextrose, 8.6 g/L  $\text{NaH}_2\text{PO}_4 \cdot \text{H}_2\text{O}$ , 5.4 g/L  $\text{Na}_2\text{HPO}_4$ , and 5 g/L Bacto casamino acids. SG-CAA medium was prepared similarly except for the addition of 100 mL/L polyethylene glycol 8000 (PEG 8000) and the substitution of dextrose by galactose. DYT medium contained 10 g/L yeast extract, 16 g/L tryptone, 5 g/L and 100 mg/L ampicillin. Phosphate-buffered saline (PBS) was composed of 8.1 g/L NaCl, 0.75 g/L KCl, 1.13 g/L  $\text{Na}_2\text{HPO}_4$ , and 0.27 g/L  $\text{KH}_2\text{PO}_4$  at pH 7.4.

RPMI cell culture media (with and without phenol red) was supplemented with 10% (v/v) fetal calf serum (FCS) and antibiotics. These materials were purchased from Sigma-Aldrich.

Human matriptase-1 was produced recombinantly, autocatalytically activated and purified as previously reported [35,49,51,60]. Bovine pancreatic trypsin, thrombin and uPA were purchased from Sigma-Aldrich and Hepsin from R&D Systems.

### Variant Cloning and Library Synthesis

For the initial display experiments of SOTI-III *wild type* and the yeast libraries based on the MCoTI-II and SOTI-III scaffold the encoding gene fragments were amplified by PCR with Taq polymerase with the use of primers with 50-bp overlap to the pCT plasmid up- or downstream of the *NheI* and *BamHI* restriction sites, respectively. Positions for randomization in case of the SOTI-III library contained the NNK degenerate codon. For the MCoTI-II library, weighted randomization of respective residues was achieved upon synthesis using pre-made codon mixtures as described [61]. Amplified PCR products were purified by phenol/chloroform extraction. The vector was digested with *NheI* and *BamHI* and purified *via* sucrose density gradient for homologous recombination in yeast. For the electroporation reaction 1–4  $\mu\text{g}$  of linearized plasmid and 10–12  $\mu\text{g}$  of insert were used [58]. After 1 h incubation (YPD medium, 30°C) library size was estimated by dilution plating. The yeast cells were transferred into selective SD-CAA medium, grown at 30°C to  $\text{OD}_{600} = 10\text{--}12$  and split into new SD-CAA medium. Library stocks were stored at  $-80^\circ\text{C}$  [58]. Yeast cells were induced in SG-CAA medium (starting  $\text{OD}_{600}$  of 0.1–0.2, 20°C, 48 h, 220 rpm).

### Surface Binding Assays and Library Screening

Surface presentation of miniproteins was monitored by flow cytometry.  $1 \cdot 10^7$  cells were labeled consecutively with 1:20 dilutions of anti-cMyc antibody (monoclonal, mouse, Abcam), anti-mouse IgG biotin conjugate (polyclonal, goat, Sigma-Aldrich), and Streptavidin, R-phycoerythrin conjugate (SPE) for 10 min on ice.

Protease binding assays and one-dimensional screenings of recombinant knottin libraries were conducted by incubation of knottin-presenting yeast cells with the respective biotinylated protease for 30 minutes on ice. Subsequently, the cells were resuspended in a 1:20 dilution of SPE for 10 min. The cells were analyzed in an Accuri C6 (Becton Dickinson) or were sorted using a MoFlo cell sorter. Sorting parameters were: trigger side scatter 650, PMT FL2 600, ex. 488 nm filter FL2 570/40. FCS files were analyzed using CFlow software or Summit 4.3, respectively.

For two-dimensional screening the yeast cells were consecutively incubated for 30 min at 0°C with 1:20 dilutions of each anti-cMyc antibody containing the desired concentration of biotinylated protease as well as a mixture of SPE and anti-mouse-IgG FITC (parameters: trigger side scatter 650, FL1 600, FL2 600).

Approximately  $2 \times 10^8$  yeast cells were run through the flow cytometer at the first round of sorting. The selected cells were cultured after each screening round in SD-CAA medium. Next screening rounds were performed with at least 10 times the number of yeast cells collected in the previous round to ensure library diversity. Sort stringency was increased by reducing the protease concentration in subsequent screening rounds.

Plasmid DNA from positive clones was isolated and transformed into DH5 $\alpha$  competent *E. coli* cells for plasmid amplification. DNA sequencing was performed using the oligonucleotide pCT-seq-lo.

### Cell Inhibition Assay

Human prostate cancer cells (PC-3, Merck KGaA) were cultured in DMEM medium with 10% FCS at 37°C and 5% CO<sub>2</sub>, washed with cation-free PBS and harvested by scraping.  $1 \times 10^5$  cells were incubated in presence of 250  $\mu\text{M}$  Bz- $\beta$ -Ala-Gly-

Arg- $\beta$ NA·AcOH (American Diagnostica), which is a specific inhibitor of urokinase, and the inhibitor of interest in defined dilutions overnight. Product formation was monitored at 405 nm before and after incubation in a microplate reader. IC<sub>50</sub> was calculated by non-linear regression using SigmaPlot 11.

### Synthesis of Cystine-knot Miniproteins

Peptides were assembled using standard Fmoc-SPPS chemistry on a fully automated microwave-assisted CEM *Liberty*<sup>®</sup> peptide synthesizer. Peptide acids were generated using an Fmoc-Gln-preloaded TentaGel resin, whereas peptide amides were synthesized on a *ChemMatrix* Fmoc-Rink amide resin. After cleavage from the solid support, oxidative folding was conducted as recently reported [34]. About 40 mg of the corresponding lyophilized crude peptide were suspended in 500  $\mu\text{L}$  acetonitrile and treated in an ultra-sonic bath for 5 min. Afterwards, 3500  $\mu\text{L}$  of the folding mixture consisting of 10% (*v/v*) DMSO, 10% (*v/v*) TFE and guanidinium hydrochloride (GuHCl) (1 M) in aqueous sodium phosphate buffer (50 mM, pH 7) were added [34]. Reaction progress was monitored *via* analytical HPLC and ESI-MS (Figures S7 and S8) [34]. For termination of the reaction and purification of the bioactive miniprotein, the mixture was directly injected into a semi-preparative HPLC system.

### RP-HPLC, LC-ESI-MS, and CD Spectroscopy

Analytical RP-HPLC was performed using a Varian LC 920 system equipped with a *Phenomenex* Synergi 4  $\mu$  Hydro-RP 80 Å (250 $\times$ 4.6 mm, 4  $\mu\text{m}$ ) column applying linear gradients of acetonitrile at a flow rate of 1 mL/min. Semi-preparative RP-HPLC purifications were performed using a Varian LC 940 system equipped with an axia-packed *Phenomenex* Luna C18 (250 $\times$ 21.2 mm, 5  $\mu\text{m}$ , 100 Å) column applying linear acetonitrile gradients at a flow rate of 18 mL/min. Isocratic elution (10% eluent B over 2 (on analytical scale) or 5 min (on semi-preparative scale)) was followed by a linear gradient of 10 $\rightarrow$ 60% B (for MCoTI variants) or 10 $\rightarrow$ 80% B (for SOTI variants) over 20 min, respectively.

LC-MS was performed with a *Shimadzu* LC-MS 2020 equipped with a *Phenomenex* Jupiter C4 (50 $\times$ 1 mm, 5  $\mu\text{m}$ , 300 Å) column using linear acetonitrile gradients at a flow rate of 0.2 mL/min (Figures S7 and S8). Isocratic elution (2% eluent B over 2 min) was followed by a linear gradient of 2 $\rightarrow$ 100% B over 10 min. Cystine-knot disulfide bond topology of MCoTI Var. 4 was confirmed using MS<sup>3</sup>-technology (AB Sciex, 4000 QTRAP<sup>®</sup> LC/MS/MS System; data not shown).

CD spectroscopy was performed as previously reported [34]. The peptides were dissolved in 2 mM aqueous Na<sub>2</sub>HPO<sub>4</sub> (pH 7) to a final concentration of 50  $\mu\text{M}$ . The resulting spectra (Figure S9 and S10) were obtained through accumulation of 10 spectra each, using a 0.1 mm quartz cuvette at 0.5 nm steps.

### Inhibition Assays

Protease inhibition assays which resulted in substrate-independent inhibition constants were performed as previously described [11,13,34,62].

Measurements were carried out in triplicate using a *Tecan Genios* ELISA reader. The normalized residual proteolytic activity (*v/v*<sub>0</sub>) of proteases was determined using substrates Boc-QAR- $\beta$ NA (250  $\mu\text{M}$ , ( $\beta$ NA stands for *para*-nitro aniline), Boc-QAR-AMC (250  $\mu\text{M}$ , AMC stands for amino-methyl coumarin) or Spectrozym tPA (250  $\mu\text{M}$ , American Diagnostica, CH<sub>3</sub>SO<sub>2</sub>-D-CHT-Gly-Arg- $\beta$ NA AcOH). Product formation was monitored after preincubation (30 min, RT) with inhibitor at different concentrations over 30 min by measuring the absorbance at 405 nm for

$\beta$ NA substrates or the fluorescence emission for AMC substrates (ex. 360 nm, em. 465 nm), respectively. Selectivity data were carried out in duplicates with final protease concentrations of uPA and thrombin of 5 nM. In case of hepsin 50 mM Tris/HCl pH 9.0 was used as assay buffer.

Apparent inhibition constants ( $K_i^{app}$ ) were calculated by fitting the Morrison equation (1) for tight-binding inhibitors to the relative reaction velocity using non-linear regression (Marquardt-Levenberg algorithm, Sigma Plot 11) [63].

$$\frac{v}{v_0} = 1 - \frac{(E_0 + I_0 + K_i^{app}) - \sqrt{(E_0 + I_0 + K_0) - 4E_0I_0}}{2E_0} \quad (1)$$

$$K_i = \frac{K_i^{app}}{\left(1 + \frac{[S]}{K_M}\right)} \quad (2)$$

Substrate-independent inhibition constants  $K_i$  were calculated from  $K_i^{app}$  and  $K_m$  of the enzyme according to (2). The Michaelis-Menten constant  $K_m$  for the substrates and proteases were determined previously [49,64].

## Results

### Selection of Knottin Scaffolds

Since the overall structure of matriptase-1 is similar to trypsin, the preference for cleavage at basic residues at the P<sub>1</sub> position is maintained [49]. Hence, we considered trypsin-inhibiting miniproteins as a starting point for functional combinatorial library design to isolate inhibitors of matriptase-1 [17]. From the plethora of miniproteins that are characterized to date, scaffolds were selected matching the following criteria: inhibitor of a trypsin-like protease, known three-dimensional structure, tolerance to variation of loop lengths and sequence, known mechanism of folding and disulfide bond formation, as well as availability through chemical and recombinant routes of synthesis [2–4]. Two different scaffold proteins have been selected based on the aforementioned requirements. The first selected scaffold was based on the spinach-derived inhibitor SOTI-III. The structure of this protease inhibitor has been recently elucidated by X-ray crystallography [13]. Since the inhibitor loop of SOTI-III is located between CysV and CysVI, this miniprotein is structurally and sequentially very distinct to MCoTI-II, which was chosen as second scaffold (Figure S1). This scaffold is based on miniproteins from the seeds of the squash plant *M. cochinchinensis*. This plant produces a number of miniprotein-based trypsin inhibitors, both backbone-cyclized macrolactams and variants lacking this motif (so-called ‘open-chain’ variants), which are slightly different in their sequences [1,17]. To evaluate which of the natural MCoTI variants could serve as a scaffold for the generation of matriptase-1 inhibitors, natural inhibitors were isolated from the *M. cochinchinensis* seeds using known extraction procedures followed by HPLC separation (Figure S2) [17,65]. Miniproteins from various fractions were identified by ESI-MS and examined for inhibition of matriptase-1 (Table S1). MCoTI-II, a macrolactam-cyclized miniprotein consisting only of natural amino acids, was found to be the most efficient natural inhibitor of matriptase-1 and therefore chosen as starting scaffold. Synthetic open-chain MCoTI-II (oMCoTI) displayed a  $K_i^{app}$  similar to that of its cyclic counterpart (Table S1). Interestingly, SOTI-III is a less potent inhibitor of trypsin and did not display measurable inhibitory activity against matriptase-1 (Table 1).

**Table 1.** Inhibition constants of inhibitors studied in this work.

| Inhibitor            | $K_i$ (Trypsin) (nM) | $K_i$ (Matriptase-1) (nM) |
|----------------------|----------------------|---------------------------|
| SOTI-III wt          | 60.6±8.4             | >1000                     |
| SOTI Var. 1          | >1000                | 28.9±3.5                  |
| MCoTI-II wt          | 2.37±0.96            | 80.7±10.0                 |
| MCoTI Var. 1         | 31.7±4.3             | 4.4±0.6                   |
| MCoTI Var. 2         | 19.2±2.8             | 3.3±0.4                   |
| MCoTI Var. 3         | 22.3±3.0             | 7.8±1.0                   |
| MCoTI Var. 4         | 35.8±4.7             | 0.83±0.14                 |
| S1 <sup>a</sup> [51] | 118±16               | 7.1±0.87                  |
| S2 <sup>a</sup> [51] | 544±74               | 28.2±3.5                  |

<sup>a</sup>Structural information for reference compounds S1 and S2 are depicted in Figure S3.

doi:10.1371/journal.pone.0076956.t001

### SOTI-III-based Library Screening

To obtain knottin-based matriptase-1 binders, yeast surface display was chosen as its applicability to the screening of cystine-knot-based peptide libraries has been already demonstrated [22,58,59,66]. To this end, the SOTI-III *wild type* or library-encoding DNA was genetically fused to the *Saccharomyces cerevisiae* Aga2p coding sequence. The resulting constructs are under control of the galactose promoter [22]. Induction with galactose yields a fusion protein consisting of Aga2p, a glycine-serine linker, an HA-epitope, the miniprotein, and a cMyc epitope (Figure 2A) [58,66–68]. The fusion is covalently bound to the surface-anchored Aga1p [58,66]. Functional display of SOTI-III *wt* was shown by binding of biotinylated bovine pancreatic trypsin followed by flow cytometric analysis (Figure 2B). After verification of functional display of the *wild type* miniprotein, the inhibitor loop was randomized by PCR using oligonucleotides with NNK codon randomization (materials and methods section). All ten loop residues of SOTI-III were considered for full randomization including the P<sub>1</sub> residue arginine, since for optimized matriptase-1 binding the P<sub>1</sub> residue may be shifted to another position within the inhibitor loop. The resulting miniprotein library had a clonal diversity of  $2 \times 10^8$ .

To isolate matriptase-1-binding SOTI-III variants, four consecutive fluorescence-activated cell sorting (FACS) screening rounds were performed (Figure 2, Figure 2C for flow cytometry screening, and materials and methods section) and one dominant clone was isolated after four sorting rounds (Figure 2D).

Subsequently, an alanine scan was conducted to determine the essential arginine residues within the inhibitor loop that contained four arginine residues. As a result, Arg29 and Arg32 were found imperative for binding and bioactivity, while Arg30 and Arg35 were dispensable without major loss of binding (Figure S4). The SOTI-based cystine-knot peptide Var. 1 was synthesized chemically using microwave-assisted Fmoc-SPPS followed by oxidative folding and HPLC purification yielding the bioactive peptide (Table S2). Subsequent inhibition assays revealed the inhibition constants against matriptase-1 and trypsin as 28.9 nM and >1  $\mu$ M, respectively (Table 1).

### MCoTI-II-based Library Design

Encouraged by these promising results, we further optimized the library design towards more potent cystine-knot inhibitors of matriptase-1. A codon-based randomization of the oMCoTI-II



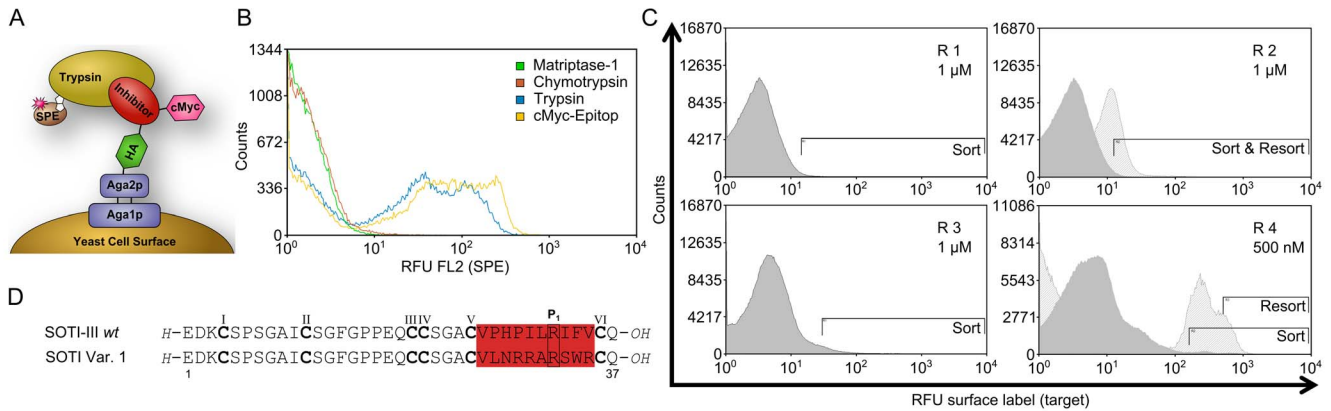

**Figure 2. Yeast surface display of SOTI-III wild type and screening against matriptase-1.** (A) Schematic illustration of Aga1p/Aga2p surface-displayed inhibitor (red) flanked by the amino terminal HA (Human influenza hemagglutinin) epitope (green) and the carboxy terminal cMyc epitope (purple). Functional display of the inhibitor is monitored by incubation with biotinylated trypsin followed by fluorescence labeling with streptavidin, R-phycoerythrin conjugate (SPE). (B) FACS histogram overlay of yeast surface presented SOTI-III wild type labeled with anti-cMyc antibody (yellow), trypsin (blue), matriptase-1 (green) and chymotrypsin (brown). (C) FACS overlays of matriptase-1 binder enrichment. The sorting round (R) and the matriptase-1 concentration used in each round ( $\mu\text{M}$ ) is given in the figures. Dark grey: FACS histogram during sorting. Light grey: FACS histogram during resort (only rounds 2 and 4). (D) Sequence alignment of SOTI-III wild type and matriptase-1-binding SOTI variant 1. Randomized residues are colored in red. Cysteines are depicted in bold letters, while cystine connections are omitted for clarity. doi:10.1371/journal.pone.0076956.g002

scaffold was used for library generation (Figure 3A and 3B), which included the inhibitor loop and neighboring residues that may contribute to target binding [61]. It is well known that a proline is required at position  $P_2$  (amino-terminal to  $P_1$ , Figure 1) of the inhibitor loop [2,4]. Thus, Pro5 was not modified since it is essential for the formation of the six-residue canonical inhibitor loop conformation that is found in many protease inhibitors [1,2,4]. Codon 6 was randomized to code for Arg or Lys (50% each), and positions 7–10 were randomized to code for the full set of 19 canonical amino acids, excluding cysteine, using a codon-based randomization scheme (Figure 3A) [22]. In addition, neighboring residues were also included into the variegation scheme to enable improved subsite binding that may contribute to both enhanced affinity and specificity. Since these residues outside the inhibitor loop may be of relevance for oMCoTI-II folding and stability, simultaneous full randomization was avoided by maintaining the original residue at each position for 50% of the variants. As a consequence, in approximately 3% of the variants all five original amino acids that are located adjacent to the inhibitor loop are expected to be preserved and the average number of residue replacements was expected to be 7 (Figure S5). In oMCoTI-II, the carboxy-terminal loop is located adjacent to the inhibitor loop and therefore can affect target binding. Tolerance of this loop region towards amino acid exchanges has been extensively investigated for the structurally similar knottin EETI [18,29,69,70]. This loop region is thought to be involved in the early folding process of the miniprotein via formation of a type II  $\beta$ -turn [2,4,11,18,70]. Since this loop sequence is a folding determinant, only moderate sequence variations were included by randomizing each position to 10%. Thus, over 50% of the variants can be expected to have none or one amino acid exchange within that region (Figure S5). The same moderate mutagenesis scheme was applied for D14 and D16 that are conserved in the ICK family of miniproteins and are involved in stabilization of the oMCoTI scaffold [2,4]. As the active site of matriptase-1 is negatively charged, it may be beneficial for binding to allow replacement of these residues [49]. Overall, the randomization scheme applied here includes 17 out of 30 residues. However, on average only 6 to

8 of the 17 residues are expected to be changed in each variant and four of these are most likely located within the inhibitor loop.

### MCoTI-II Library Screening

To evaluate the feasibility of library design that includes 17 of 30 residues in the randomization scheme, two relatively small yeast libraries with a diversity of  $2 \times 10^6$  and  $2 \times 10^7$  clones, respectively, were independently constructed from the same synthetic library DNA and screened separately. After two to four rounds of screening, matriptase-1-binding populations were enriched. Individual matriptase-1-binding clones were identified using flow cytometry (Figure 3C). DNA sequences were obtained (10 from the screen of the library with a diversity of  $2 \times 10^6$  clones as well as 12 of the 3<sup>rd</sup> and 16 out of the 4<sup>th</sup> round of the library containing  $2 \times 10^7$  clones, respectively; Figure S6). From these, four binders were selected for detailed investigations (Figure 3D) that were independently identified several times in screening rounds three and four or displayed high affinity binding upon yeast cell surface affinity titration (Figure S6).

To determine the inhibition constants, chemical synthesis and oxidative folding of the putatively inhibiting cystine-knot peptides were performed as previously reported (Table S2) [34]. Correct fold of the miniproteins was proven through bioactivity, since it is known that knottins of the ICK family displaying an incorrect disulfide connectivity show a decreased inhibitory efficiency [3,11,15,30,34]. Moreover, CD spectra of SOTI wt, SOTI Var. 1, MCoTI wt and MCoTI Var. 4 indicated  $\beta$ -sheet formation (Figures S9 and S10). Disulfide bond connectivities were confirmed by MS<sup>3</sup> mass spectrometry for MCoTI Var. 4 via continuous injection of a 3  $\mu\text{M}$  solution of the miniprotein at a flow rate of 10  $\mu\text{L}/\text{min}$  into an ABSCIEX 4000 QTRAP<sup>®</sup> LC/MS/MS system (data not shown) [71]. Inhibition constants in the low nanomolar to sub-nanomolar range were obtained for all MCoTI-based miniproteins (Table 1). An additionally performed selectivity study for the best MCoTI-based inhibitor candidate Var. 4 revealed inhibition constants  $K_i > 10 \mu\text{M}$  against thrombin, uPA, and hepsin (Table 2). Moreover, inhibitory activity for matriptase-1 was approximately fortyfold higher than for trypsin (Table 1).

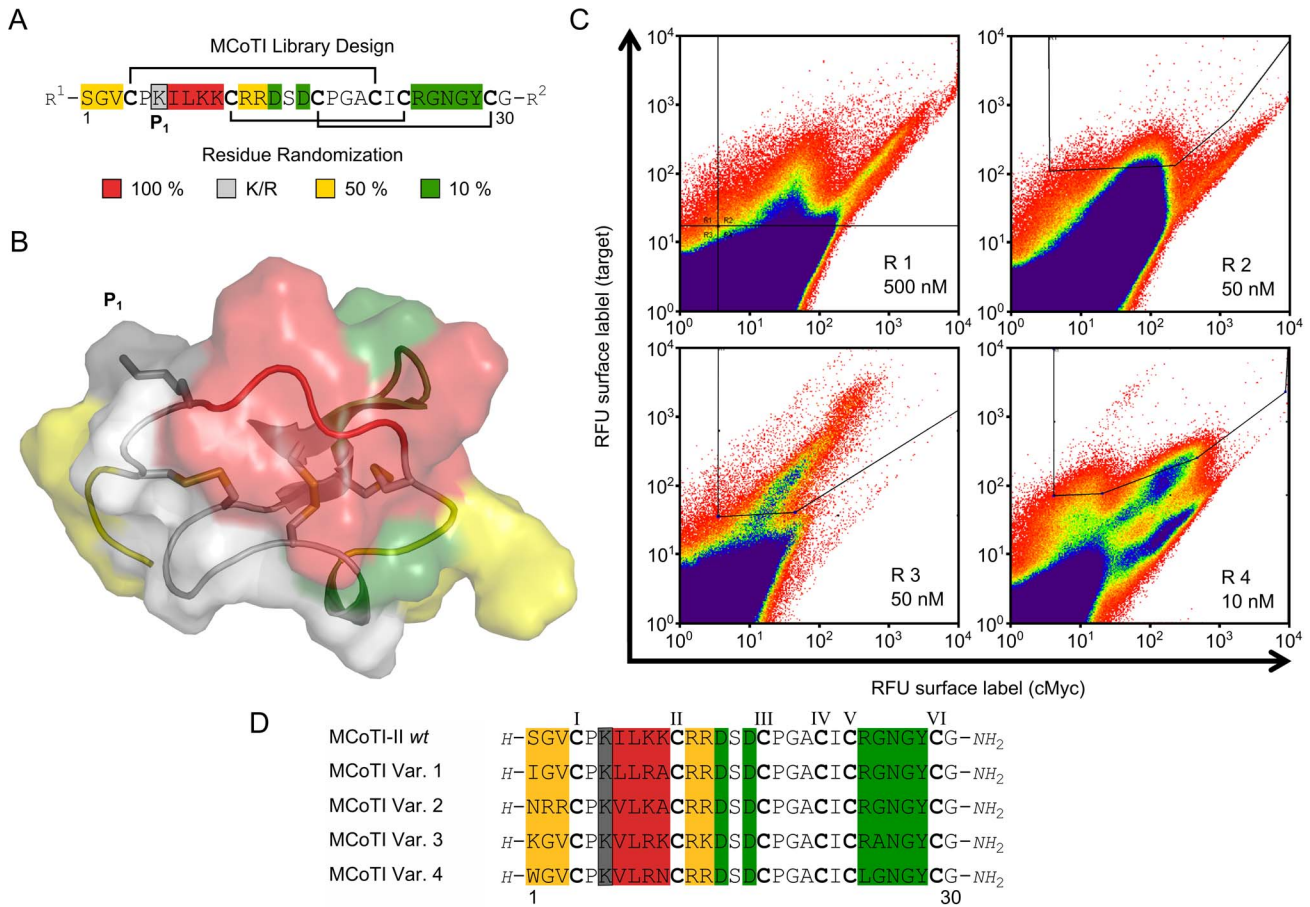

**Figure 3. Summary of MCoTI-II-based library design and screening against matriptase-1.** (A) Sequence of open-chain MCoTI-II *wild type*. Cysteines are depicted in bold letters. R<sup>1</sup> represents the amino-terminal flanking sequence, including the HA-epitope. R<sup>2</sup> represents the carboxy-terminal flanking sequence, including the cMyc-epitope. Codon randomization for (A), (B), and (D) as indicated by color (at pos. 6 only Lys or Arg was allowed, grey). (B) Secondary structure of MCoTI-II is shown as cartoon with surface, cysteine residues are shown as orange sticks. (C) FACS histograms showing four rounds of sorting with decreasing target concentration for enrichment of matriptase-1 binders. R denotes the sort round with the concentration of matriptase-1 indicated. Actual sort gates are shown. (D) Sequence alignment of matriptase-1-binding MCoTI variants. Cysteines are numbered according to the appearance in the sequence and depicted in bold letters, while cysteine connections are omitted for clarity. doi:10.1371/journal.pone.0076956.g003

**Inhibition of uPA Activation**

Urokinase-type plasminogen activator (uPA) causes the degradation of the extracellular matrix and plays a critical role in tumor invasion and metastasis [72,73]. It was shown that activation of receptor-bound pro-uPA is affected by matriptase-1, which results in a decreased ability of uPA-expressing tumor cells to invade an extracellular matrix layer upon inhibition of membrane-bound

matriptase-1 [72]. To investigate the inhibitory activity of the newly isolated matriptase-1 inhibitors on pro-uPA activation, a dose-response assay of uPA activity was performed in cell culture with SOTI-based variant (Var. 1) and the most potent MCoTI-based inhibitor (Var. 4) on human prostate carcinoma cancer cells (PC-3), as a upregulation of matriptase-1 expression level has been reported for this cell line [45,69,72].

For the indirect determination of the IC<sub>50</sub> of SOTI Var. 1 and MCoTI Var. 4 on the surface of these cancer cells, the turnover of an uPA substrate was monitored. Pro-uPA is activated through non-inhibited matriptase-1 and substrate turnover was measured and compared to the previously reported small molecule inhibitor S1 of matriptase-1 (Figure 4) [51]. In this experimental setting, the MCoTI-based inhibitor Var. 4 (K<sub>i</sub> = 0.83 nM) exhibited an IC<sub>50</sub> of 213 nM, while SOTI-III derived inhibitor Var. 1 displayed only minor activity. S1 a small-molecule inhibitor (Figure S3) that has been identified recently as potent matriptase-1 inhibitor with an K<sub>i</sub> in the single digit nanomolar range was used as reference compound that displayed a tenfold higher IC<sub>50</sub> value than MCoTI-based inhibitor Var. 4 in this assay [51]. For control SOTI *wt* was also applied in this experimental setting at a

**Table 2. Selectivity profile of MCoTI-based inhibitor Var. 4.**

| Protease     | K <sub>i</sub> (nM) |
|--------------|---------------------|
| Trypsin      | 35.8 ± 4.7          |
| Matriptase-1 | 0.83 ± 0.1          |
| Thrombin     | >10000 <sup>a</sup> |
| Urokinase    | >10000 <sup>a</sup> |
| Hepsin       | >10000 <sup>a</sup> |

<sup>a</sup>No inhibition was observed at 10 μM inhibitor concentration. doi:10.1371/journal.pone.0076956.t002

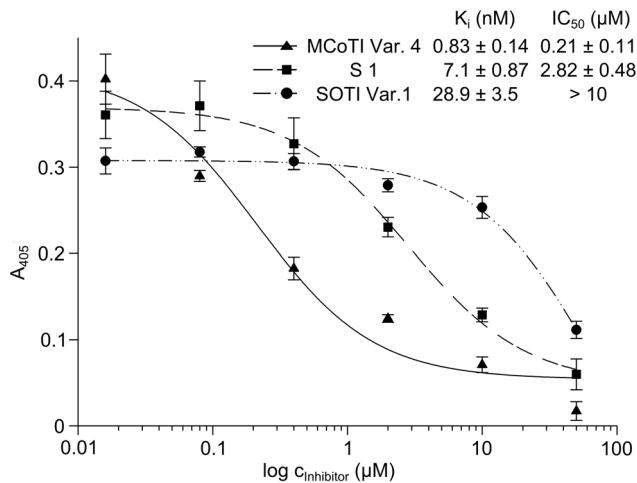

**Figure 4. Inhibition assay of uPA activation by matriptase-1 on the surface of PC-3 cells.** Depicted is the logarithmic inhibitor concentration against the absorption at 405 nm. doi:10.1371/journal.pone.0076956.g004

concentration of 10  $\mu$ M, displaying no inhibition of either matriptase-1 or uPA.

## Discussion

For the isolation of miniprotein-based inhibitors by combinatorial library screening the design of the variant library is a crucial step. We chose a knowledge-based strategy that takes into account the expected contribution to target binding, as well as the natural variability and the contribution to structure and folding of each residue at each position. While we followed a classical variegation scheme for SOTI-III with a full randomization that is restricted to the carboxy terminal loop, a position-specific randomization scheme was applied for oMCoTI-II.

Screening of the SOTI-III library resulted in the isolation of a variant that displayed 29 nM  $K_i$  with respect to matriptase-1 inhibition and contained the sequence motif RRAR in the inhibitor loop. This agrees with the consensus sequence for matriptase-1 substrates and the highly potent inhibitor peptide *H-R-Q-A-R-Bt* [45,49,56,57]. Despite the fact that the absolute position of the  $P_1$  arginine residue within the inhibitor loop remained unchanged, increased inhibitory activity towards matriptase-1 interestingly led to the total loss of trypsin inhibition. Hence, in comparison to the *wild type* miniprotein, the isolated SOTI-based matriptase-1 inhibitor (Var. 1) showed improved inhibitory activity and selectivity. Notably, the recently reported crystal structure of SOTI-III *wild type* revealed that out of the 10 carboxy terminal loop residues only 8 were in direct contact to trypsin [13]. Thus, exclusion of core-forming residues from the randomization scheme of SOTI-based inhibitor Var. 1 and generating a sub-library for the flanking residues might result in variants with further improved binding characteristics. Moreover, experiments on co-crystallization of matriptase-1 and SOTI Var. 1 are required to understand the mode of interaction of protease and inhibitor. Additionally, it would be beneficial to gain further knowledge on whether the conformational constraints that are imposed on the SOTI-III *wild type* inhibitor loop *via* integration into the cystine-knot scaffold are also conserved in the matriptase-1 inhibitor Var. 1. Assuming an unchanged mode of action, the knottin-based peptide acts as a matriptase-1 inhibitor rather than as a substrate that is readily and irreversibly cleaved.

Screening of the oMCoTI-scaffold-derived library resulted in several inhibitors that all displayed  $K_i$  values in low nanomolar to sub-nanomolar range. Despite the fact that the library diversity was 10-fold lower than for the SOTI scaffold and with  $2 \times 10^7$  clones relatively small, more potent binders were isolated corroborating the concept of knowledge-based library design. It should also be noted that oMCoTI-II *wt* in contrast to SOTI-III *wt* already displayed inhibitory activity against matriptase-1 and therefore may be the more suitable scaffold for optimization towards matriptase-1-binding and inhibition. Branched aliphatic residues were observed at the  $P_1$  position of isolated matriptase-1-binding oMCoTI library variants, while leucine was the preferred  $P_2$ -positioned amino acid. In contrast to reported substrates and inhibitors, lysine was obviously favored over an arginine residue at the  $P_1$  position (Figure 3D) [45,56]. While amino acid residue 1 displayed a large variability, replacements of the 'GV-motif' at positions 2 and 3 rarely occurred, demonstrating the importance of these residues for binding and/or folding (Figure 3D). Whereas no substitutions within loop 2 (flanked by CysII and CysIII) were observed, Arg24 was exchanged for leucine in the most potent inhibitor Var. 4 (Figure 3D). It remains to be elucidated, whether this residue replacement contributes to enhanced inhibition.

To investigate the inhibition of pro-uPA activation cell culture upon matriptase-1 inhibition, miniproteins SOTI Var. 1 and MCoTI Var. 4 as well as reference compound S1 were applied to human pancreatic PC-3 cells (Figure 4) [45,72]. MCoTI-based knottin Var. 4 that had a subnanomolar  $K_i$  towards matriptase-1 also displayed the lowest  $IC_{50}$  with respect to the inhibition of proteolytic activity in a PC-3 cell line [74–76]. This indicates that inhibitor-mediated reduction of matriptase-1 activity contributes to the decrease of uPA activity.  $IC_{50}$  values ranged from a nanomolar to micromolar range and MCoTI-based inhibitor Var. 4 was found to be 10-fold more potent than recently described peptidomimetic small-molecule inhibitors (Figure 4) [51].

All three inhibitors investigated displayed  $IC_{50}$  values of protease inhibition on PC-3 cells more than 100-fold higher compared to their  $K_i$  of matriptase-1 inhibition. This discrepancy may arise from the complicated situation in cell culture since matriptase-1 activity is regulated by the cognate natural tight-binding inhibitor HAI-1. Co-expression of HAI-1 and matriptase-1 suppresses matriptase-1 proteolytic activity. Interestingly, HAI-1 has also been considered to be required for activation of matriptase-1 and to be involved in its expression and autoprocessing [38,39,41,57,77]. Moreover, absence of HAI-1 seems to cause rapid turnover of active matriptase-1 [57,77]. Hence, the complicated conditions in the cell-culture media, in the cell and on its surface may account for the observed differences of  $K_i$  and  $IC_{50}$ .

In recent years, matriptase-1 has attracted keen scientific interest as a target for the development of inhibitors. Steinmetzer and coworkers reported small molecule inhibitors that display similar potency and selectivity *in vitro* as well as in cell-based assays as the miniproteins generated in this study [51,76]. In addition, two types of peptidic matriptase-1 inhibitors have been identified to date [49,56]. The short substrate-derived inhibitor *H-R-Q-A-R-Bt* displays an inhibition constant in the double-digit picomolar range. Due to the small size and susceptibility to proteolytic degradation, *in vivo* half-life can be expected to be short. Moreover, the universal sequence is not selective for matriptase-1, but inhibits various proteases in the pico- to nanomolar range [56]. Compared to the tetrapeptide, the sunflower trypsin inhibitor (SFTI)-based matriptase-1 inhibitor that has been described recently has an increased size (14 residues) combined with a constrained structure, thus being potentially more stable and

applicable for *in vivo* experiments [49]. Recently, Daly and coworkers obtained by rational design and positional scanning mutagenesis a cyclic MCoTI-II variant with subnanomolar inhibition constant of matriptase-1 that was found to be more potent than SFTI derived variants, corroborating the notion that the MCoTI-II miniprotein scaffold provides an excellent structural environment for the development of potent and selective matriptase inhibitors [78]. Serum stability and potential oral availability has been shown for several knottins and it will be interesting to see whether the MCoTI-derived inhibitors display similar stability in cell culture and serum while maintaining activity and selectivity.

Knottins have been introduced by Cochran and coworkers as a new class of agents for imaging of tumor marker expression in living systems [18,24,79]. For example,  $^{64}\text{Cu}$ -DOTA-conjugated knottin peptides were stable in mouse serum, and *in vivo* metabolite analysis showed minimal degradation in blood or tumor rendering this type of stable peptides very promising candidates as clinical diagnostics for a variety of cancers [79]. The spectrum of tumor targeting knottins, which is currently restricted to cystine-knot peptides containing integrin binding RGD sequences in their binding loops, can be extended by matriptase-1 binders for imaging applications. The miniproteins described in this study selectively detect cell-surface-exposed and enzymatically active matriptase-1 on tumor cells that is not complexed with the natural inhibitor HAI-1. In contrast, with one notable exception most antibodies cannot distinguish between the active and inactive form of matriptase-1, due to their binding to accessible epitopes that are not linked to the active site or conformational changes upon activation. Recently, Craik and coworkers showed that an active-site-specific, recombinant human antibody for matriptase-1 can be used to visualize the tumorigenic epithelium using near-infrared and single-photon emission computed tomography imaging, corroborating the notion that the active form of matriptase-1 is a tumorigenic biomarker [81]. Since matriptase-1 provides the major contribution to tumor invasion and progression, knottins selectively addressing the active site of matriptase-1 may become valuable tools for tumor imaging, particularly for the prediction of tumor invasiveness.

## Conclusions

To conclude, we have proven the applicability of a knowledge-based miniprotein library design to the development of potent inhibitors of human matriptase-1 using a codon-based, weighted, and selective randomization scheme. A set of cystine-knot miniprotein variants was generated that included a relatively large number of residues that may contribute to binding while the average number and position-specific frequency of amino acid replacements was carefully controlled. As a consequence, screening of a relatively small library revealed (sub-) nanomolar inhibitors. Bioactivity was confirmed in cell culture through a dose-response inhibition assay on the surface of human cancer cells. Taking into consideration the high affinity and selectivity combined with the high general thermodynamic stability of miniproteins, the variants described here may become promising tools for applications in cancer diagnostics. *In vivo* experiments towards tumor targeting with labeled synthetic miniproteins are currently in progress.

## Supporting Information

**Figure S1 Sequences and structure alignment of cystine-knot trypsin inhibitors.** Secondary structure of oM-CoTI-II (light brown, pdb: 1ha9, upper left) and SOTI-III (light

blue, pdb: 4aor, upper right) is shown as cartoon and cysteine residues are depicted as yellow sticks; protease-binding regions are depicted in red. Cystine-forming residues are marked bold, and the numbering of respective cysteines is according to their appearance in the sequence.

(PNG)

**Figure S2 HPLC trace of MCoTI-variants isolated from seeds of *Momordica cochinchinensis*.** x marks an unidentified peak.  $[\beta\text{-Asp}]\text{-MCoTI-II}$  possesses a  $\beta$ -aspartyl residue at position 4. Cyclic miniproteins were isolated from 5 g of homogenized seeds. Extraction was performed using 20 mL aqueous sodium acetate (20 mM, pH 4.5) at ambient temperature for 16 h. The suspension was filtrated and proteins were denatured with 20 mL aqueous acetone (40%, v/v), while the miniproteins remained their native conformation. After removal of acetone under reduced pressure, the suspension was filtrated and the filtrate was purified by semi-preparative HPLC using an axia-packed Phenomenex Luna C18 (250 $\times$ 21.2 mm, 5  $\mu\text{m}$ , 100  $\text{\AA}$ ) column applying linear acetonitrile gradients at a flow rate of 10 mL/min. Isocratic elution (10% eluent B over 5 was followed by a linear gradient of 10 $\rightarrow$ 55% B over 30 min.

(TIF)

**Figure S3 Small-molecule inhibitors of matriptase-1 that were used as reference compounds.**

(PNG)

**Figure S4 Matriptase-1 binding analysis of miniprotein variants SOTI Var. 1 and MCoTI Var. 4 via flow cytometry.** (A) Sequence of the isolated matriptase-1 inhibitors with randomized residues depicted in the according color. (B) Overlay of FACS histograms after labeling of miniprotein-displaying yeast cells with 1  $\mu\text{M}$  of biotinylated matriptase-1 followed by incubation with Streptavidin, R-phycoerythrin conjugate.

(PNG)

**Figure S5 Knottin library design.** Expected distribution of the appearance of amino acid exchanges in loop 1 (red), flanking regions of loop 1 (yellow), and loop 4 (green). The calculation was performed assuming a binominal distribution function.

(PNG)

**Figure S6 Sequence alignments of MCoTI variants isolated from two screening cycles.** Amino acids marked in red are identical to those of the MCoTI-*wt*; amino acids highlighted in red are conserved for all aligned sequences. The blue frames show the consensus of at least two amino acids. The consensus sequence (bottom line) was calculated with a threshold of 0.5. Consensus sequence: upper-case letters indicate sequential identity, lower-case letters illustrate consensus. MCoTI *wt* was taken as lead sequence for the alignment. Sequences that were selected for chemical peptide synthesis and further studies are marked on the right.

(PNG)

**Figure S7 HPLC and MS analysis of folded miniprotein SOTI Var. 1.** (A) HPLC trace (10 to 80% B over 20 min) at 220 nm. (B) ESI-MS of peptide-containing fraction.

(TIF)

**Figure S8 HPLC and MS analysis of MCoTI Var. 1.** (A) HPLC trace (10 to 60% B over 20 min) at 220 nm. (B) ESI-MS of peptide-containing fraction.

(TIF)



**Figure S9 CD spectroscopy of the reduced (unfolded) and oxidized (folded) variants of SOTI *wt* and SOTI Var.**

1. Smoothed with the 'smooth' function of Sigma Plot 11. (TIF)

**Figure S10 CD spectroscopy of the reduced (unfolded) and oxidized (folded) variants of MCoTI *wt* and MCoTI Var. 4.**

Smoothed with the 'smooth' function of Sigma Plot 11. (TIF)

**Table S1 Apparent inhibition constants towards matriptase-1 of the isolated cyclic MCoTI variants.**

(PDF)

**Table S2 Characterization of synthetic miniproteins.**

(PDF)

**References**

- Chiche L, Heitz A, Gelly JC, Gracy J, Chau PT, et al. (2004) Squash inhibitors: from structural motifs to macrocyclic knottins. *Curr Protein Pept Sci* 5: 341–349.
- Gracy J, Le-Nguyen D, Gelly JC, Kaas Q, Heitz A, et al. (2008) KNOTTIN: the knottin or inhibitor cystine knot scaffold in 2007. *Nucleic Acids Res* 36: D314–319.
- Reinwarth M, Nasu D, Kolmar H, Avrutina O (2012) Chemical Synthesis, Backbone Cyclization and Oxidative Folding of Cystine-knot Peptides - Promising Scaffolds for Applications in Drug Design. *Molecules* 17: 12533–12552.
- Gelly JC, Gracy J, Kaas Q, Le-Nguyen D, Heitz A, et al. (2004) The KNOTTIN website and database: a new information system dedicated to the knottin scaffold. *Nucleic Acids Res* 32: D156–159.
- Kolmar H (2009) Biological diversity and therapeutic potential of natural and engineered cystine knot miniproteins. *Curr Opin Pharmacol* 9: 608–614.
- Craik DJ, Daly NL, Waine C (2001) The cystine knot motif in toxins and implications for drug design. *Toxicol* 39: 43–60.
- Puttamadappa SS, Jagadish K, Shekhtman A, Camarero JA (2010) Backbone dynamics of cyclotide MCoTI-I free and complexed with trypsin. *Angew Chem Int Ed Engl* 49: 7030–7034.
- Wang CK, Hu SH, Martin JL, Sjogren T, Hajdu J, et al. (2009) Combined X-ray and NMR analysis of the stability of the cyclotide cystine knot fold that underpins its insecticidal activity and potential use as a drug scaffold. *J Biol Chem* 284: 10672–10683.
- Craik DJ, Cemazar M, Wang CK, Daly NL (2006) The cyclotide family of circular miniproteins: nature's combinatorial peptide template. *Biopolymers* 84: 250–266.
- Heitz A, Avrutina O, Le-Nguyen D, Diederichsen U, Hernandez JF, et al. (2008) Knottin cyclization: impact on structure and dynamics. *BMC Struct Biol* 8: 54.
- Avrutina O, Schmoltdt HU, Gabrijelcic-Geiger D, Le Nguyen D, Sommerhoff CP, et al. (2005) Trypsin inhibition by macrocyclic and open-chain variants of the squash inhibitor MCoTI-II. *Biol Chem* 386: 1301–1306.
- Kowalska J, Pszczola K, Wilimowska-Pelc A, Lorenc-Kubis I, Zuziak E, et al. (2007) Trypsin inhibitors from the garden four o'clock (*Mirabilis jalapa*) and spinach (*Spinacia oleracea*) seeds: isolation, characterization and chemical synthesis. *Phytochemistry* 68: 1487–1496.
- Glotzbach B, Schmelz S, Reinwarth M, Christmann A, Heinz DW, et al. (2013) Structural characterization of *Spinacia oleracea* trypsin inhibitor III (SOTI-III). *Acta Crystallogr D Biol Crystallogr* 69: 114–120.
- Heitz A, Chiche L, Le-Nguyen D, Castro B (1989) 1H 2D NMR and distance geometry study of the folding of Ecballium elaterium trypsin inhibitor, a member of the squash inhibitors family. *Biochemistry* 28: 2392–2398.
- Kratzner R, Debreczeni JE, Pape T, Schneider TR, Wentzel A, et al. (2005) Structure of Ecballium elaterium trypsin inhibitor II (EETI-II): a rigid molecular scaffold. *Acta Crystallogr D Biol Crystallogr* 61: 1255–1262.
- Le-Nguyen D, Heitz A, Chiche L, el Hajji M, Castro B (1993) Characterization and 2D NMR study of the stable [9–21, 15–27] 2 disulfide intermediate in the folding of the 3 disulfide trypsin inhibitor EETI II. *Protein Sci* 2: 165–174.
- Hernandez JF, Gagnon J, Chiche L, Nguyen TM, Andrieu JP, et al. (2000) Squash trypsin inhibitors from *Momordica cochinchinensis* exhibit an atypical macrocyclic structure. *Biochemistry* 39: 5722–5730.
- Kimura RH, Cheng Z, Gambhir SS, Cochran JR (2009) Engineered knottin peptides: a new class of agents for imaging integrin expression in living subjects. *Cancer Res* 69: 2435–2442.
- Werle M, Kafedjiiski K, Kolmar H, Bernkop-Schnürch A (2007) Evaluation and improvement of the properties of the novel cystine-knot microprotein MCoEeTI for oral administration. *Int J Pharm* 332: 72–79.
- Werle M, Schmitz T, Huang HL, Wentzel A, Kolmar H, et al. (2006) The potential of cystine-knot microproteins as novel pharmacophoric scaffolds in oral peptide drug delivery. *J Drug Target* 14: 137–146.
- Jiang L, Kimura RH, Miao Z, Silverman AP, Ren G, et al. (2010) Evaluation of a <sup>64</sup>Cu-labeled cystine-knot peptide based on agouti-related protein for PET of tumors expressing  $\alpha_v\beta_3$  integrin. *J Nucl Med* 51: 251–258.
- Silverman AP, Levin AM, Lahti JL, Cochran JR (2009) Engineered cystine-knot peptides that bind  $\alpha_v\beta_3$  integrin with antibody-like affinities. *J Mol Biol* 385: 1064–1075.
- Reiss S, Sieber M, Oberler V, Wentzel A, Spangenberg P, et al. (2006) Inhibition of platelet aggregation by grafting RGD and KGD sequences on the structural scaffold of small disulfide-rich proteins. *Platelets* 17: 153–157.
- Jiang L, Miao Z, Kimura RH, Silverman AP, Ren G, et al. (2012) <sup>111</sup>In-labeled cystine-knot peptides based on the Agouti-related protein for targeting tumor angiogenesis. *J Biomed Biotechnol* 2012: 368075.
- Stricher F, Huang CC, Descours A, Duquesnoy S, Combes O, et al. (2008) Combinatorial optimization of a CD4-mimetic miniprotein and cocrystal structures with HIV-1 gp120 envelope glycoprotein. *J Mol Biol* 382: 510–524.
- Vita C, Drakopoulou E, Vizzavona J, Rochette S, Martin L, et al. (1999) Rational engineering of a miniprotein that reproduces the core of the CD4 site interacting with HIV-1 envelope glycoprotein. *Proc Natl Acad Sci U S A* 96: 13091–13096.
- Avrutina O, Schmoltdt HU, Gabrijelcic-Geiger D, Wentzel A, Frauendorf H, et al. (2008) Head-to-tail cyclized cystine-knot peptides by a combined recombinant and chemical route of synthesis. *Chembiochem* 9: 33–37.
- Sommerhoff CP, Avrutina O, Schmoltdt HU, Gabrijelcic-Geiger D, Diederichsen U, et al. (2010) Engineered cystine knot miniproteins as potent inhibitors of human mast cell tryptase  $\beta$ . *J Mol Biol* 395: 167–175.
- Christmann A, Walter K, Wentzel A, Kratzner R, Kolmar H (1999) The cystine knot of a squash-type protease inhibitor as a structural scaffold for *Escherichia coli* cell surface display of conformationally constrained peptides. *Protein Eng* 12: 797–806.
- Wentzel A, Christmann A, Kratzner R, Kolmar H (1999) Sequence requirements of the GPNG  $\beta$ -turn of the Ecballium elaterium trypsin inhibitor II explored by combinatorial library screening. *J Biol Chem* 274: 21037–21043.
- Getz JA, Rice JJ, Daugherty PS (2011) Protease-resistant peptide ligands from a knottin scaffold library. *ACS Chem Biol* 6: 837–844.
- Thongyoo P, Jaulent AM, Tate EW, Leatherbarrow RJ (2007) Immobilized protease-assisted synthesis of engineered cysteine-knot microproteins. *Chembiochem* 8: 1107–1109.
- Martin L, Stricher F, Misse D, Sironi F, Pugniere M, et al. (2003) Rational design of a CD4 mimic that inhibits HIV-1 entry and exposes cryptic neutralization epitopes. *Nat Biotechnol* 21: 71–76.
- Reinwarth M, Glotzbach B, Tomaszowski M, Fabritz S, Avrutina O, et al. (2013) Oxidative folding of peptides with cystine-knot architectures: kinetic studies and optimization of folding conditions. *Chembiochem* 14: 137–146.
- Takeuchi T, Shuman MA, Craik CS (1999) Reverse biochemistry: use of macromolecular protease inhibitors to dissect complex biological processes and identify a membrane-type serine protease in epithelial cancer and normal tissue. *Proc Natl Acad Sci U S A* 96: 11054–11061.
- Yuan C, Chen L, Mechan EJ, Daly N, Craik DJ, et al. (2011) Structure of catalytic domain of Matriptase in complex with Sunflower trypsin inhibitor-1. *BMC Struct Biol* 11: 30.
- Lin CY, Anders J, Johnson M, Sang QA, Dickson RB (1999) Molecular cloning of cDNA for matriptase, a matrix-degrading serine protease with trypsin-like activity. *J Biol Chem* 274: 18231–18236.
- Oberst MD, Williams CA, Dickson RB, Johnson MD, Lin CY (2003) The activation of matriptase requires its noncatalytic domains, serine protease domain, and its cognate inhibitor. *J Biol Chem* 278: 26773–26779.
- Lee MS, Tseng IC, Wang Y, Kiyomiya K, Johnson MD, et al. (2007) Autoactivation of matriptase in vitro: requirement for biomembrane and LDL receptor domain. *Am J Physiol Cell Physiol* 293: C95–105.
- Tseng IC, Xu H, Chou FP, Li G, Vazzano AP, et al. (2010) Matriptase activation, an early cellular response to acidosis. *J Biol Chem* 285: 3261–3270.
- List K, Haudenschild CC, Szabo R, Chen W, Wahl SM, et al. (2002) Matriptase/MT-SP1 is required for postnatal survival, epidermal barrier function, hair follicle development, and thymic homeostasis. *Oncogene* 21: 3765–3779.

**Acknowledgments**

We thank AB SCIEEX Germany GmbH, Darmstadt for providing equipment and expertise in MS measurements of the cystine-knot peptides. We also thank Philipp Czechowski and Prof. Michael Reggelen for kindly providing equipment and measuring time for the CD spectra. This work was supported in part by Deutsche Forschungsgemeinschaft SPP1623 through grant KO1390/10-1.

**Author Contributions**

Conceived and designed the experiments: AC OA HK. Performed the experiments: BG MR NW SF MT HF. Analyzed the data: BG MR NW SF MT HF AC OA HK. Contributed reagents/materials/analysis tools: BG MR NW SF MT HF AC OA HK. Wrote the paper: BG MR AC OA HK.

42. Milner JM, Patel A, Davidson RK, Swingle TE, Desilets A, et al. (2010) Matriptase is a novel initiator of cartilage matrix degradation in osteoarthritis. *Arthritis Rheum* 62: 1955–1966.
43. Kilpatrick LM, Harris RL, Owen KA, Bass R, Ghorayeb C, et al. (2006) Initiation of plasminogen activation on the surface of monocytes expressing the type II transmembrane serine protease matriptase. *Blood* 108: 2616–2623.
44. Cheng MF, Jin JS, Wu HW, Chiang PC, Sheu LF, et al. (2007) Matriptase expression in the normal and neoplastic mast cells. *Eur J Dermatol* 17: 375–380.
45. Uhland K (2006) Matriptase and its putative role in cancer. *Cell Mol Life Sci* 63: 2968–2978.
46. List K (2009) Matriptase: a culprit in cancer? *Future Oncol* 5: 97–104.
47. Saleem M, Adhami VM, Zhong W, Longley BJ, Lin CY, et al. (2006) A novel biomarker for staging human prostate adenocarcinoma: overexpression of matriptase with concomitant loss of its inhibitor, hepatocyte growth factor activator inhibitor-1. *Cancer Epidemiol Biomarkers Prev* 15: 217–227.
48. Lee JW, Yong Song S, Choi JJ, Lee SJ, Kim BG, et al. (2005) Increased expression of matriptase is associated with histopathologic grades of cervical neoplasia. *Hum Pathol* 36: 626–633.
49. Avrutina O, Fittler H, Glotzbach B, Kolmar H, Empting M (2012) Between two worlds: a comparative study on in vitro and in silico inhibition of trypsin and matriptase by redox-stable SFTI-1 variants at near physiological pH. *Org Biomol Chem*.
50. Galkin AV, Mullen L, Fox WD, Brown J, Duncan D, et al. (2004) CVS-3983, a selective matriptase inhibitor, suppresses the growth of androgen independent prostate tumor xenografts. *Prostate* 61: 228–235.
51. Steinmetzer T, Schweinitz A, Sturzebecher A, Donnecke D, Uhland K, et al. (2006) Secondary amides of sulfonylated 3-amidinophenylalanine. New potent and selective inhibitors of matriptase. *J Med Chem* 49: 4116–4126.
52. Oberst MD, Chen LY, Kiyomiya K, Williams CA, Lee MS, et al. (2005) HAI-1 regulates activation and expression of matriptase, a membrane-bound serine protease. *Am J Physiol Cell Physiol* 289: C462–470.
53. Oberst MD, Johnson MD, Dickson RB, Lin CY, Singh B, et al. (2002) Expression of the serine protease matriptase and its inhibitor HAI-1 in epithelial ovarian cancer: correlation with clinical outcome and tumor clinicopathological parameters. *Clin Cancer Res* 8: 1101–1107.
54. List K, Szabo R, Molinolo A, Sriuranpong V, Redeye V, et al. (2005) Deregulated matriptase causes ras-independent multistage carcinogenesis and promotes ras-mediated malignant transformation. *Genes Dev* 19: 1934–1950.
55. Seitz I, Hess S, Schulz H, Eckl R, Busch G, et al. (2007) Membrane-type serine protease-1/matriptase induces interleukin-6 and -8 in endothelial cells by activation of protease-activated receptor-2: potential implications in atherosclerosis. *Arterioscler Thromb Vasc Biol* 27: 769–775.
56. Colombo E, Désilets A, Duchêne D, Chagnon F, Najmanovich R, et al. (2012) Design and synthesis of potent, selective inhibitors of matriptase. *ACS Med Chem Lett* 3: 530–534.
57. Yamasaki Y, Satomi S, Murai N, Tsuzuki S, Fushiki T (2003) Inhibition of membrane-type serine protease 1/matriptase by natural and synthetic protease inhibitors. *J Nutr Sci Vitaminol (Tokyo)* 49: 27–32.
58. Boder ET, Wittrup KD (1997) Yeast surface display for screening combinatorial polypeptide libraries. *Nat Biotechnol* 15: 553–557.
59. Chao G, Lau WL, Hackel BJ, Sazinsky SL, Lippow SM, et al. (2006) Isolating and engineering human antibodies using yeast surface display. *Nat Protoc* 1: 755–768.
60. Desilets A, Longpre JM, Beaulieu ME, Leduc R (2006) Inhibition of human matriptase by eglin c variants. *FEBS Lett* 580: 2227–2232.
61. Van den Brulle J, Fischer M, Langmann T, Horn G, Waldmann T, et al. (2008) A novel solid phase technology for high-throughput gene synthesis. *Biotechniques* 45: 340–343.
62. Boy RG, Mier W, Nothelfer EM, Altmann A, Eisenhut M, et al. (2010) Sunflower trypsin inhibitor 1 derivatives as molecular scaffolds for the development of novel peptidic radiopharmaceuticals. *Mol Imaging Biol* 12: 377–385.
63. Morrison JF (1969) Kinetics of the reversible inhibition of enzyme-catalysed reactions by tight-binding inhibitors. *Biochim Biophys Acta* 185: 269–286.
64. Tischler M, Nasu D, Empting M, Schmelz S, Heinz DW, et al. (2012) Braces for the peptide backbone: insights into structure-activity relationships of protease inhibitor mimics with locked amide conformations. *Angew Chem Int Ed Engl* 51: 3708–3712.
65. Felizmenio-Quimio ME, Daly NL, Craik DJ (2001) Circular proteins in plants: solution structure of a novel macrocyclic trypsin inhibitor from *Momordica cochinchinensis*. *J Biol Chem* 276: 22875–22882.
66. Gera N, Hussain M, Rao BM (2012) Protein selection using yeast surface display. *Methods*.
67. Silverman AP, Levin AM, Lahti JL, Cochran JR (2009) Engineered cystine-knot peptides that bind  $\alpha_v\beta_3$  integrin with antibody-like affinities. *J Mol Biol* 385: 1064–1075.
68. Silverman AP, Kariolis MS, Cochran JR (2011) Cystine-knot peptides engineered with specificities for  $\alpha_{IIb}\beta_3$  or  $\alpha_{IIb}\beta_3$  and  $\alpha_v\beta_3$  integrins are potent inhibitors of platelet aggregation. *J Mol Recognit* 24: 127–135.
69. Chen M, Fu YY, Lin CY, Chen LM, Chai KX (2007) Prostatein induces protease-dependent and independent molecular changes in the human prostate carcinoma cell line PC-3. *Biochim Biophys Acta* 1773: 1133–1140.
70. Lahti JL, Silverman AP, Cochran JR (2009) Interrogating and predicting tolerated sequence diversity in protein folds: application to E. claterium trypsin inhibitor-II cystine-knot miniprotein. *PLoS Comput Biol* 5: e1000499.
71. Chen J, Shiyonov P, Schlager JJ, Green KB (2012) A pseudo MS3 approach for identification of disulfide-bonded proteins: uncommon product ions and database search. *J Am Soc Mass Spectrom* 23: 225–243.
72. Suzuki M, Kobayashi H, Kanayama N, Saga Y, Lin CY, et al. (2004) Inhibition of tumor invasion by genomic down-regulation of matriptase through suppression of activation of receptor-bound pro-urokinase. *J Biol Chem* 279: 14899–14908.
73. Andreasen PA, Egelund R, Petersen HH (2000) The plasminogen activation system in tumor growth, invasion, and metastasis. *Cell Mol Life Sci* 57: 25–40.
74. Chen WH, Horoszewicz JS, Leong SS, Shimano T, Penetrante R, et al. (1982) Human pancreatic adenocarcinoma: in vitro and in vivo morphology of a new tumor line established from ascites. *In Vitro* 18: 24–34.
75. Tan MH, Shimano T, Chu TM (1981) Differential localization of human pancreas cancer-associated antigen and carcinoembryonic antigen in homologous pancreatic tumoral xenograft. *J Natl Cancer Inst* 67: 563–569.
76. Uhland K, Siphos B, Arkona C, Schuster M, Petri B, et al. (2009) Use of IHC and newly designed matriptase inhibitors to elucidate the role of matriptase in pancreatic ductal adenocarcinoma. *Int J Oncol* 35: 347–357.
77. Domoto T, Takino T, Guo L, Sato H (2012) Cleavage of hepatocyte growth factor activator inhibitor-1 by membrane-type MMP-1 activates matriptase. *Cancer Sci* 103: 448–454.
78. Quimbar P, Malik U, Sommerhoff CP, Kaas Q, Chan LY, et al. (2013) High-affinity cyclic peptide matriptase inhibitors. *J. Biol. Chem.* 288: 13885–13896.
79. Jiang L, Kimura RH, Miao Z, Silverman AP, Ren G, et al. (2010) Evaluation of a  $^{64}\text{Cu}$ -labeled cystine-knot peptide based on agouti-related protein for PET of tumors expressing  $\alpha_v\beta_3$  integrin. *J Nucl Med* 51: 251–258.
80. Ganesan R, Eigenbrot C, Kirchhofer D (2010) Structural and mechanistic insight into how antibodies inhibit serine proteases. *Biochem J* 430: 179–189.
81. LeBeau AM, Lee M, Murphy ST, Hann BC, Warren RS, et al. (2013) Imaging a functional tumorigenic biomarker in the transformed epithelium. *Proc Natl Acad Sci U S A* 110: 93–98.
